# Supplementary material
Source: PubMed Central journal article supplement (PMC11027583)
Supplement: 262_2020_2548_MOESM1_ESM.pdf [file 262_2020_2548_MOESM1_ESM.pdf]

| Patient | Gender | Age | Axl   | IGFBP-1 | PD-L1 | PGE2  | Tumor load |
|---------|--------|-----|-------|---------|-------|-------|------------|
| 1       | male   | 36  | 406,2 | 295,6   | 8,8   | 161,6 | high       |
| 2       | male   | 34  | 516,3 | 726,8   | 10,2  | 63,9  | high       |
| 3       | male   | 32  | 304,9 | 169,1   | 11,2  | 92,4  | high       |
| 4       | male   | 23  | 532,9 | 231,6   | 10,9  | 167,0 | high       |
| 5       | female | 39  | 363,3 | 818,6   | 8,2   | 34,7  | high       |
| 6       | male   | 20  | 393,7 | 261,4   | 12,9  | 139,6 | high       |
| 7       | male   | 48  | 392,7 | 479,6   | 13,2  | 249,7 | high       |
| 8       | female | 22  | 549,4 | 818,6   | 18,1  | 81,9  | high       |
| 9       | male   | 24  | 587,5 | 402,6   | 4,3   | 133,0 | high       |
| 10      | male   | 70  | 425,1 | 704,0   | 20,2  | 105,1 | high       |
| 11      | male   | 19  | 530,1 | 255,0   | 8,7   | 149,9 | high       |
| 12      | female | 32  | 367,8 | 588,1   | 2,9   | 233,8 | high       |
| 13      | male   | 23  | 415,3 | 59,3    | 6,8   | 75,5  | high       |
| 14      | female | 32  | 396,4 | 343,2   | 7,0   | 413,2 | high       |
| 15      | female | 41  | 508,6 | 267,6   | 6,9   | 74,9  | high       |
| 16      | male   | 45  | 319,1 | 255,1   | 7,2   | 155,1 | high       |
| 17      | female | 23  | 440,6 | 103,2   | 6,0   | 96,3  | high       |
| 18      | female | 19  | 408,6 | 314,5   | 8,5   | 522,6 | high       |
| 19      | male   | 29  | 306,1 | 10,7    | 6,8   | 73,3  | high       |
| 20      | female | 21  | 235,9 | 109,5   | 3,5   | 83,8  | high       |
| 21      | male   | 20  | 442,9 | 649,6   | 10,5  | 162,0 | high       |
| 22      | male   | 24  | 330,4 | 751,3   | 8,2   | 167,7 | high       |
| 23      | female | 50  | 399,1 | 818,6   | 11,7  | 47,1  | high       |
| 24      | male   | 17  | 321,6 | 249,2   | 11,6  | 50,4  | high       |
| 25      | female | 51  | 280,1 | 139,7   | 6,8   | 17,6  | high       |
| 26      | female | 22  | 251,5 | 669,5   | 9,3   | 142,1 | high       |
| 27      | male   | 20  | 492,3 | 527,3   | 0,0   | 251,3 | high       |
| 28      | male   | 47  | 354,2 | 430,3   | 9,3   | 84,5  | high       |
| 29      | male   | 21  | 434,4 | 93,7    | 9,1   | 211,1 | high       |
| 30      | male   | 17  | 307,3 | 112,5   | 8,8   | 69,9  | high       |
| 31      | male   | 27  | 344,8 | 818,6   | 6,7   | 244,4 | high       |
| 32      | male   | 22  | 421,7 | 256,1   | 7,5   | 160,3 | high       |
| 33      | male   | 33  | 369,7 | 360,7   | 7,8   | 34,6  | medium     |
| 34      | male   | 31  | 251,2 | 165,6   | 6,8   | 72,3  | medium     |
| 35      | female | 33  | 332,2 | 232,3   | 13,5  | 420,6 | medium     |
| 36      | female | 31  | 313,2 | 413,9   | 6,1   | 288,4 | medium     |
| 37      | male   | 64  | 268,3 | 357,9   | 8,9   | 143,6 | medium     |
| 38      | male   | 18  | 204,4 | 2,9     | 5,5   | 84,5  | medium     |
| 39      | male   | 31  | 327,0 | 30,4    | 8,4   | 866,7 | medium     |
| 40      | female | 59  | 381,0 | 117,4   | 8,5   | 54,4  | medium     |
| 41      | female | 33  | 301,9 | 152,9   | 5,4   | 163,3 | medium     |
| 42      | female | 54  | 517,6 | 388,2   | 12,2  | 190,5 | medium     |
| 43      | male   | 27  | 319,1 | 510,9   | 2,7   | 282,8 | medium     |
| 44      | male   | 19  | 539,2 | 818,6   | 11,2  | 126,7 | medium     |
| 45      | male   | 23  | 353,3 | 368,1   | 8,9   | 963,9 | medium     |
| 46      | male   | 33  | 237,6 | 135,6   | 7,9   | 152,5 | medium     |
| 47      | male   | 42  | 589,8 | 187,4   | 8,0   | 118,7 | medium     |

|    |        |    |       |       |      |       |        |
|----|--------|----|-------|-------|------|-------|--------|
| 48 | male   | 41 | 281,6 | 217,0 | 3,9  | 589,4 | medium |
| 49 | female | 25 | 176,5 | 818,6 | 9,2  | 366,2 | medium |
| 50 | male   | 44 | 317,0 | 163,9 | 13,7 | 196,4 | medium |
| 51 | male   | 35 | 447,8 | 66,2  | 5,3  | 61,3  | medium |
| 52 | female | 48 | 217,9 | 791,6 | 6,0  | 142,2 | medium |
| 53 | female | 40 | 204,5 | 317,3 | 2,9  | 228,1 | medium |
| 54 | male   | 52 | 341,2 | 103,7 | 15,4 | 89,1  | medium |
| 55 | female | 21 | 331,9 | 93,6  | 6,9  | 339,6 | medium |
| 56 | female | 40 | 210,4 | 324,3 | 7,7  | 74,9  | medium |
| 57 | male   | 34 | 439,5 | 42,8  | 11,1 | 270,7 | no     |
| 58 | female | 30 | 286,3 | 89,0  | 10,3 | 248,1 | no     |
| 59 | male   | 37 | 290,3 | 277,4 | 10,5 | 135,3 | no     |
| 60 | male   | 56 | 203,4 | 494,0 | 7,5  | 441,6 | no     |
| 61 | female | 58 | 249,6 | 417,6 | 9,3  | 283,9 | no     |
| 62 | female | 39 | 189,5 | 82,4  | 4,4  | 131,8 | no     |
| 63 | female | 44 | 354,5 | 356,7 | 13,8 | 448,5 | no     |
| 64 | female | 31 | 222,3 | 123,2 | 5,1  | 349,1 | no     |
| 65 | male   | 40 | 382,0 | 110,8 | 8,3  | 41,1  | no     |
| 66 | male   | 33 | 466,5 | 724,8 | 2,8  | 343,1 | no     |
| 67 | male   | 25 | 519,1 | 584,6 | 11,3 | 169,3 | no     |
| 68 | male   | 28 | 282,5 | 818,6 | 6,4  | 253,6 | no     |
| 69 | female | 61 | 491,0 | 99,9  | 7,2  | 88,6  | no     |
| 70 | female | 48 | 189,1 | 818,6 | 7,2  | 73,2  | no     |
| 71 | female | 51 | 265,5 | 49,4  | 9,8  | 305,7 | no     |
| 72 | male   | 58 | 359,3 | 40,6  | 6,9  | 22,7  | no     |
| 73 | female | 39 | 324,9 | 569,5 | 4,3  | 323,0 | no     |
| 74 | female | 40 | 217,5 | 92,4  | 5,2  | 579,3 | no     |
| 75 | male   | 44 | 294,8 | 31,9  | 5,5  | 169,2 | no     |
| 76 | male   | 50 | 262,5 | 594,0 | 6,4  | 67,1  | no     |
| 77 | female | 36 | 307,1 | 703,0 | 11,6 | 345,2 | no     |
| 78 | female | 66 | 176,9 | 218,6 | 4,1  | 66,0  | no     |
| 79 | female | 25 | 167,9 | 562,4 | 9,3  | 437,0 | no     |
| 80 | female | 45 | 320,8 | 657,4 | 6,8  | 26,9  | no     |
| 81 | female | 35 | 290,5 | 235,7 | 9,2  | 122,6 | no     |
| 82 | female | 42 | 316,8 | 818,6 | 9,8  | 389,1 | no     |
| 83 | male   | 25 | 285,6 | 382,2 | 8,1  | 236,6 | no     |
| 84 | female | 55 | 277,3 | 731,3 | 7,1  | 158,8 | no     |
| 85 | female | 24 | 295,8 | 160,6 | 10,0 | 220,8 | no     |
| 86 | female | 52 | 324,7 | 692,0 | 7,6  | 141,3 | no     |
| 87 | female | 55 | 437,1 | 492,1 | 10,8 | 60,5  | no     |
| 88 | female | 26 | 386,8 | 545,9 | 9,1  | 416,2 | no     |
| 89 | female | 26 | 235,6 | 225,6 | 17,0 | 152,4 | no     |
| 90 | female | 41 | 244,2 | 402,5 | 13,2 | 248,2 | no     |
| 91 | female | 50 | 214,0 | 332,9 | 21,8 | 65,0  | no     |
| 92 | female | 41 | 175,1 | 747,0 | 14,0 | 141,1 | no     |
| 93 | male   | 48 | 328,8 | 220,6 | 11,5 | 67,7  | no     |
| 94 | male   | 27 | 400,4 | 210,1 | 18,9 | 174,3 | no     |
| 95 | female | 60 | 289,5 | 333,1 | 14,6 | 83,6  | no     |

|     |        |    |       |       |      |       |       |
|-----|--------|----|-------|-------|------|-------|-------|
| 96  | female | 53 | 296,4 | 528,6 | 19,5 | 98,9  | no    |
| 97  | female | 47 | 148,4 | 98,1  | 10,6 | 76,2  | no    |
| 98  | female | 46 | 175,8 | 416,2 | 13,5 | 34,7  | no    |
| 99  | female | 40 | 288,4 | 354,3 | 8,3  | 31,7  | no    |
| 100 | female | 57 | 195,5 | 147,1 | 17,5 | 114,8 | no    |
| 101 | male   | 47 | 346,1 | 577,6 | 19,1 | 149,1 | mpnst |
| 102 | male   | 29 | 257,1 | 619,4 | 18,7 | 94,9  | mpnst |
| 103 | male   | 24 | 216,9 | 136,9 | 15,7 | 227,5 | mpnst |
| 104 | female | 47 | 88,2  | 753,7 | 9,5  | 26,4  | mpnst |
| 105 | female | 47 | 467,4 | 806,9 | 21,3 | 119,3 | mpnst |
| 106 | female | 22 | 294,3 | 299,3 | 17,1 | 47,5  | mpnst |
| 107 | male   | 31 | 189,8 | 152,4 | 17,3 | 213,5 | mpnst |
| 108 | male   | 38 | 238,2 | 721,9 | 12,3 | 95,3  | mpnst |
| 109 | male   | 47 | 311,4 | 595,5 | 13,3 | 178,4 | mpnst |
| 110 | female | 41 | 188,9 | 161,5 | 13,3 | 297,6 | mpnst |
| 111 | female | 55 | 133,7 | 806,9 | 8,5  | 142,0 | mpnst |
| 112 | female | 50 | 217,5 | 8,7   | 9,8  | 556,6 | mpnst |
| 113 | female | 55 | 299,9 | 193,8 | 13,9 | 64,8  | mpnst |
| 114 | female | 25 | 324,5 | 167,7 | 11,5 | 301,9 | mpnst |
| 115 | male   | 45 | 255,3 | 806,9 | 17,9 | 242,7 | mpnst |
| 116 | male   | 43 | 241,7 | 108,2 | 14,1 | 34,2  | mpnst |
| 117 | male   | 68 | 319,5 | 806,9 | 15,4 | 75,0  | mpnst |
| 118 | female | 50 | 247,1 | 84,3  | 13,8 | 99,1  | mpnst |
| 119 | male   | 36 | 296,9 | 133,2 | 15,3 | 282,7 | mpnst |
| 120 | female | 34 | 108,8 | 228,2 | 16,7 | 26,6  | mpnst |
| 121 | male   | 29 | 181,4 | 281,0 | 11,4 | 102,3 | mpnst |
| 122 | male   | 49 | 75,5  | 796,6 | 10,0 | 41,7  | mpnst |
| 123 | female | 47 | 466,7 | 806,9 | 25,4 | 32,3  | mpnst |
| 124 | female | 34 | 270,7 | 143,6 | 13,0 | 140,9 | mpnst |
| 125 | female | 32 | 226,9 | 806,9 | 14,0 | 131,3 | mpnst |

**Serum concentration in pg/ml**

**Tumor Volume**

no: <10 ml

medium: 50 - 300 ml

high: > 500 ml

mpnst

**Supplement Table 1:** Raw data of the cohort of 125 NF1 patients.
